# Supplementary material for: Bulk and single-cell RNA sequencing identify prognostic signatures related to FGFBP2+ NK cell in hepatocellular carcinoma
Source: PeerJ journal article supplement (doi:10.7717/peerj.19337), 2025-05-20

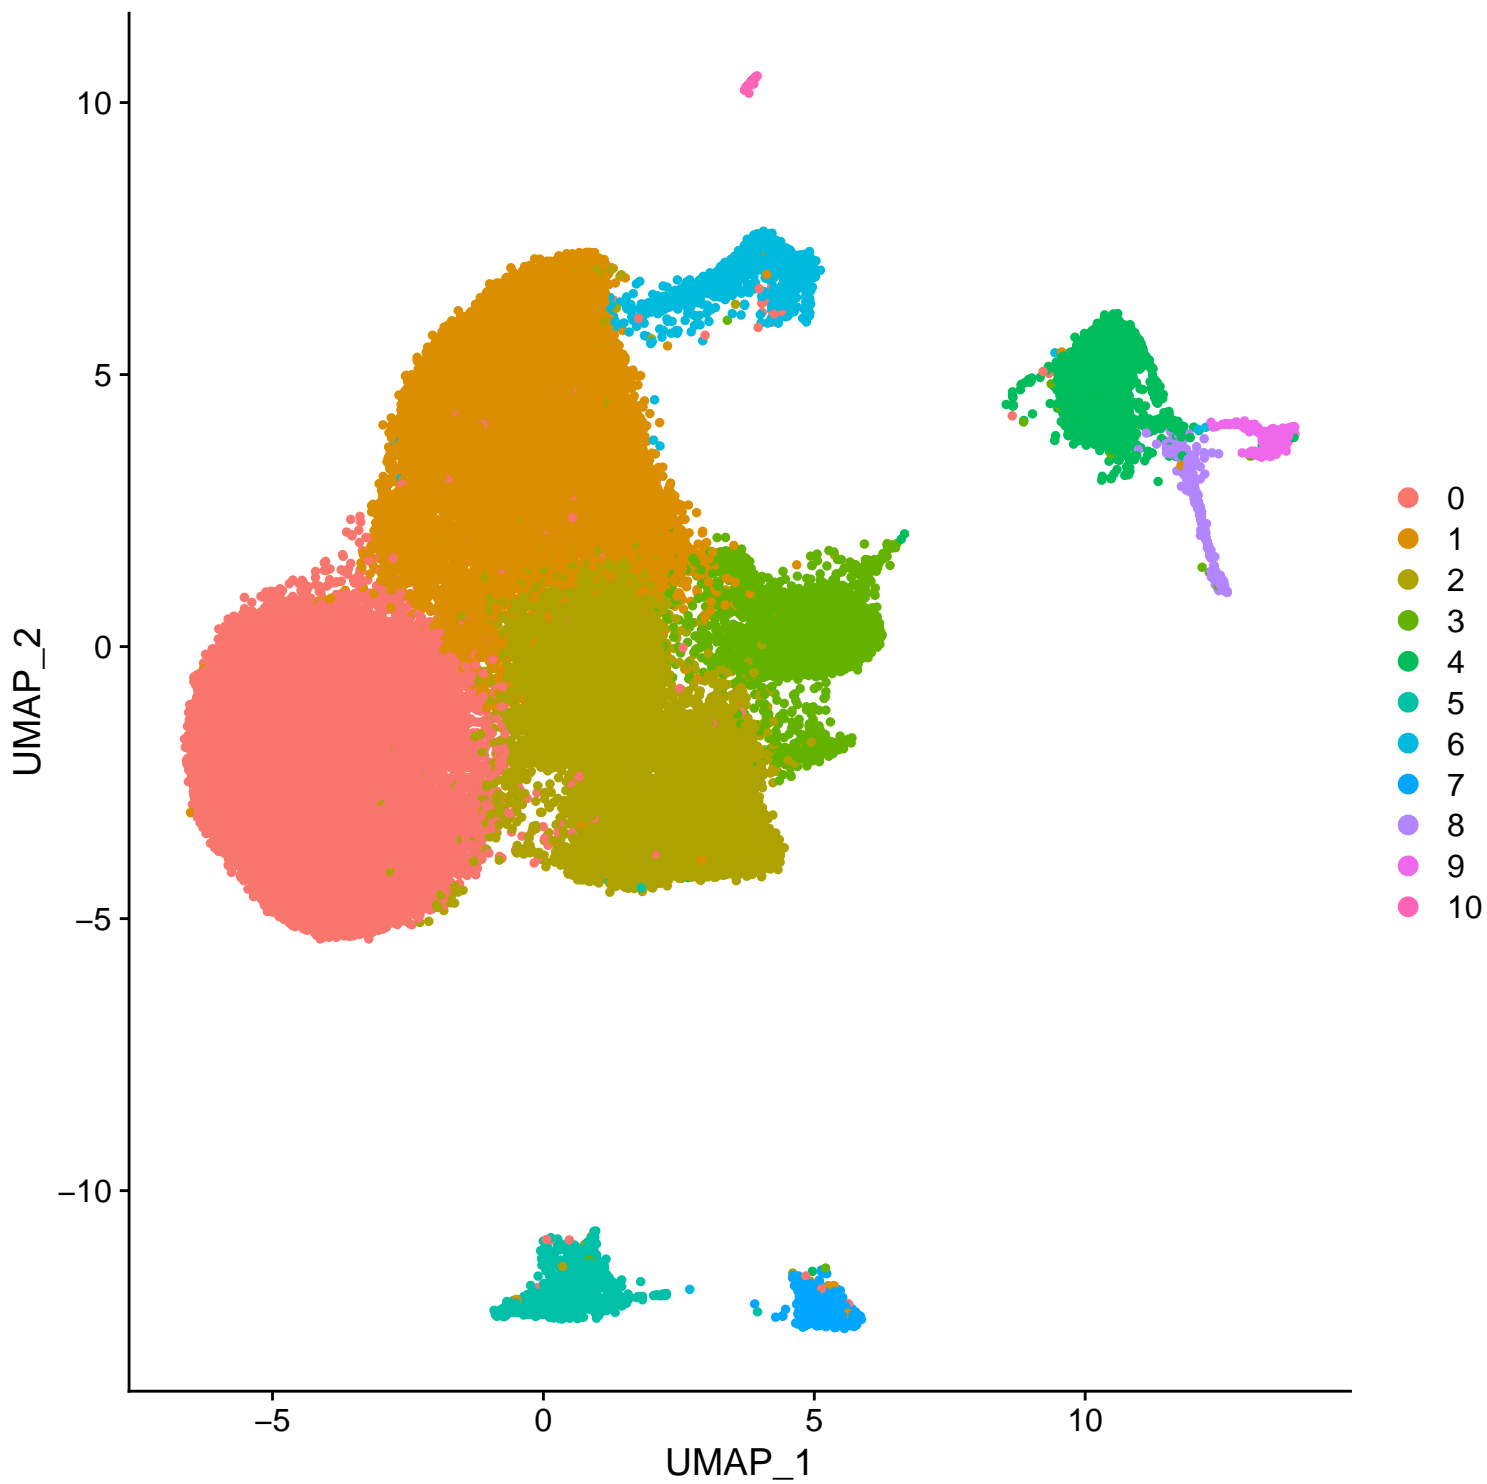

Supplement: FigS1.pdf [file FigS1.pdf]
