# Supplementary material for: Bulk and single-cell RNA sequencing identify prognostic signatures related to FGFBP2+ NK cell in hepatocellular carcinoma
Source: PeerJ. 2025 May 20;13:e19337. doi: 10.7717/peerj.19337 (PMC12101446; doi:10.7717/peerj.19337)
Supplement: Supplemental Information 5 [file peerj-13-19337-s005.xls]

## Sheet: Sheet1
ITEM TO CHECK	IMPORTANCE	CHECKLIST
EXPERIMENTAL DESIGN
Definition of experimental and control groups	E	Page9 Line181-182
Number within each group	E	Page9 Line181-182
Assay carried out by core lab or investigator's lab?	D	Not Applicable
Acknowledgement of authors' contributions	D	Not Applicable
SAMPLE
Description	E	Page9 Line181-188
Volume/mass of sample processed	D	Not Applicable
Microdissection or macrodissection	E	Page9 Line190-197
Processing procedure	E	Page9 Line190-197
If frozen - how and how quickly?	E	Page9 Line190-197
If fixed - with what, how quickly?	E	Page9 Line190-197
Sample storage conditions and duration (especially for FFPE samples)	E	Page9 Line190-197
NUCLEIC ACID EXTRACTION
Procedure and/or instrumentation	E	Page9 Line190-197
Name of kit and details of any modifications	E	Page9 Line190-197
Source of additional reagents used	D	Not Applicable
Details of DNase or RNAse treatment	E	Page9 Line190-197
Contamination assessment (DNA or RNA)	E	Page9 Line190-197
Nucleic acid quantification	E	Page9 Line190-197
Instrument and method	E	Page9 Line190-197
Purity (A260/A280)	D	Not Applicable
Yield	D	Not Applicable
RNA integrity method/instrument	E	Page9 Line190-197
RIN/RQI or Cq of 3' and 5' transcripts	E	Page9 Line190-197
Electrophoresis traces	D	Not Applicable
Inhibition testing (Cq dilutions, spike or other)	E	Page9 Line190-197
REVERSE TRANSCRIPTION
Complete reaction conditions	E	Page9 Line190-197
Amount of RNA and reaction volume	E	Page9 Line190-197
Priming oligonucleotide (if using GSP) and concentration	E	Page9 Line190-197
Reverse transcriptase and concentration	E	Page9 Line190-197
Temperature and time	E	Page9 Line190-197
Manufacturer of reagents and catalogue numbers	D	Not Applicable
Cqs with and without RT	D*	Not Applicable
Storage conditions of cDNA	D	Not Applicable
qPCR TARGET INFORMATION
If multiplex, efficiency and LOD of each assay.	E	Page9 Line190-197
Sequence accession number	E	Page9 Line190-197
Location of amplicon	D	Not Applicable
Amplicon length	E	Page9 Line190-197
In silico specificity screen (BLAST, etc)	E	Page9 Line190-197
Pseudogenes, retropseudogenes or other homologs?	D	Not Applicable
Sequence alignment	D	Not Applicable
Secondary structure analysis of amplicon	D	Not Applicable
Location of each primer by exon or intron (if applicable)	E	Page9 Line190-197
What splice variants are targeted?	E	Page9 Line190-197
qPCR OLIGONUCLEOTIDES
Primer sequences	E	Page9 Line190-197
RTPrimerDB Identification Number	D	Not Applicable
Probe sequences	D**	Not Applicable
Location and identity of any modifications	E	Page9 Line190-197
Manufacturer of oligonucleotides	D	Not Applicable
Purification method	D	Not Applicable
qPCR PROTOCOL
Complete reaction conditions	E	Page9 Line190-197
Reaction volume and amount of cDNA/DNA	E	Page9 Line190-197
Primer, (probe), Mg++ and dNTP concentrations	E	Page9 Line190-197
Polymerase identity and concentration	E	Page9 Line190-197
Buffer/kit identity and manufacturer	E	Page9 Line190-197
Exact chemical constitution of the buffer	D	Not Applicable
Additives (SYBR Green I, DMSO, etc.)	E	Page9 Line190-197
Manufacturer of plates/tubes and catalog number	D	Not Applicable
Complete thermocycling parameters	E	Page9 Line190-197
Reaction setup (manual/robotic)	D	Not Applicable
Manufacturer of qPCR instrument	E	Page9 Line190-197
qPCR VALIDATION
Evidence of optimisation (from gradients)	D	Not Applicable
Specificity (gel, sequence, melt, or digest)	E	Page9 Line190-197
For SYBR Green I, Cq of the NTC	E	Page9 Line190-197
Standard curves with slope and y-intercept	E	Page9 Line190-197
PCR efficiency calculated from slope	E	Page9 Line190-197
Confidence interval for PCR efficiency or standard error	D	Not Applicable
r2 of standard curve	E	Page9 Line190-197
Linear dynamic range	E	Page9 Line190-197
Cq variation at lower limit	E	Page9 Line190-197
Confidence intervals throughout range	D	Not Applicable
Evidence for limit of detection	E	Page9 Line190-197
If multiplex, efficiency and LOD of each assay.	E	Page9 Line190-197
DATA ANALYSIS
qPCR analysis program (source, version)	E	Page9 Line190-197
Cq method determination	E	Page9 Line190-197
Outlier identification and disposition	E	Page9 Line190-197
Results of NTCs	E	Page9 Line190-197
Justification of number and choice of reference genes	E	Page9 Line190-197
Description of normalisation method	E	Page9 Line190-197
Number and concordance of biological replicates	D	Not Applicable
Number and stage (RT or qPCR) of technical replicates	E	Page9 Line190-197
Repeatability (intra-assay variation)	E	Page9 Line190-197
Reproducibility (inter-assay variation, %CV)	D	Not Applicable
Power analysis	D	Not Applicable
Statistical methods for result significance	E	Page9 Line190-197
Software (source, version)	E	Page9 Line190-197
Cq or raw data submission using RDML	D	Not Applicable
Table 1. MIQE checklist for authors, reviewers and editors. All essential information (E) must be submitted with the manuscript. Desirable
information (D) should be submitted if available. If using primers obtained from RTPrimerDB, information on qPCR target, oligonucleotides,
protocols and validation is available from that source.
*: Assessing the absence of DNA using a no RT assay is essential when first extracting RNA. Once the sample has been validated as
RDNA-free, inclusion of a no-RT control is desirable, but no longer essential.
**: Disclosure of the probe sequence is highly desirable and strongly encouraged. However, since not all commercial pre-designed assay
vendors provide this information, it cannot be an essential requirement. Use of such assays is advised against.
